# Supplementary material
Source: publisher site journal article supplement (https://bdj.pensoft.net/article/download/suppl/3653694/)
Supplement: Supplementary file 1 [file  › doc.kml]

<?xml version="1.0" encoding="UTF-8"?>
<kml xmlns="http://www.opengis.net/kml/2.2" xmlns:gx="http://www.google.com/kml/ext/2.2" xmlns:xsi="http://www.w3.org/2001/XMLSchema-instance"
 xsi:schemaLocation="http://www.opengis.net/kml/2.2 http://schemas.opengis.net/kml/2.2.0/ogckml22.xsd http://www.google.com/kml/ext/2.2 http://code.google.com/apis/kml/schema/kml22gx.xsd">
<Document id="Trechus_terrabravensis">
  <name>Trechus_terrabravensis</name>
  <Snippet></Snippet>
  <Folder id="FeatureLayer0">
    <name>Trechus_terrabravensis</name>
    <Snippet></Snippet>
    <Placemark id="ID_00000">
      <name>Trechus terrabravensis</name>
      <Snippet></Snippet>
      <description><![CDATA[<html xmlns:fo="http://www.w3.org/1999/XSL/Format" xmlns:msxsl="urn:schemas-microsoft-com:xslt">

<head>

<META http-equiv="Content-Type" content="text/html">

<meta http-equiv="content-type" content="text/html; charset=UTF-8">

</head>

<body style="margin:0px 0px 0px 0px;overflow:auto;background:#FFFFFF;">

<table style="font-family:Arial,Verdana,Times;font-size:12px;text-align:left;width:100%;border-collapse:collapse;padding:3px 3px 3px 3px">

<tr style="text-align:center;font-weight:bold;background:#9CBCE2">

<td>Trechus terrabravensis</td>

</tr>

<tr>

<td>

<table style="font-family:Arial,Verdana,Times;font-size:12px;text-align:left;width:100%;border-spacing:0px; padding:3px 3px 3px 3px">

<tr>

<td>FID</td>

<td>0</td>

</tr>

<tr bgcolor="#D4E4F3">

<td>Id</td>

<td>0</td>

</tr>

<tr>

<td>ID_NO</td>

<td>0</td>

</tr>

<tr bgcolor="#D4E4F3">

<td>BINOMIAL</td>

<td>Trechus terrabravensis</td>

</tr>

<tr>

<td>PRESENCE</td>

<td>1</td>

</tr>

<tr bgcolor="#D4E4F3">

<td>ORIGIN</td>

<td>1</td>

</tr>

<tr>

<td>SEASONAL</td>

<td>1</td>

</tr>

<tr bgcolor="#D4E4F3">

<td>COMPILER</td>

<td>Anja Danielczak</td>

</tr>

<tr>

<td>YEAR</td>

<td>2017</td>

</tr>

<tr bgcolor="#D4E4F3">

<td>CITATION</td>

<td>Paulo Borges</td>

</tr>

</table>

</td>

</tr>

</table>

</body>

</html>

]]></description>
      <styleUrl>#PolyStyle00</styleUrl>
      <MultiGeometry>
        <Polygon>
          <extrude>0</extrude>          <altitudeMode>clampToGround</altitudeMode>
          <outerBoundaryIs><LinearRing><coordinates> -27.18915370085709,38.74694373200657,0 -27.18918536765463,38.74719294757206,0 -27.18921880797408,38.74743853110599,0 -27.18925404365255,38.74768064277933,0 -27.18929109332501,38.74791941040559,0 -27.1893299789131,38.74815497290555,0 -27.1893707124285,38.74838740077731,0 -27.18941330896402,38.74861678006094,0 -27.18945778174666,38.74884318189163,0 -27.18950416628271,38.7490667779652,0 -27.18955245309369,38.74928751389072,0 -27.18960265324485,38.74950544021368,0 -27.18965477659916,38.74972059970904,0 -27.18970883434627,38.74993303807793,0 -27.1897648336335,38.75014278293362,0 -27.18982278286571,38.75034986573714,0 -27.18988268962179,38.75055431355065,0 -27.18994465461447,38.75075644931411,0 -27.19000859709617,38.75095598950065,0 -27.19007452363937,38.75115295460952,0 -27.19014244021814,38.75134736247752,0 -27.19021235347083,38.75153923195869,0 -27.19028426796605,38.75172857544644,0 -27.19035818890802,38.75191540663661,0 -27.19043412105518,38.75209973754912,0 -27.19051207452752,38.75228159197927,0 -27.19059204840257,38.75246096702271,0 -27.19067404685078,38.7526378720295,0 -27.19075807370212,38.75281231525839,0 -27.19084413315695,38.75298430537404,0 -27.19093222822612,38.75315384833924,0 -27.19102236227821,38.75332095063449,0 -27.1911145384151,38.75348561800783,0 -27.19127715361635,38.7537665132548,0 -27.19143841254595,38.75403644482236,0 -27.19159899557247,38.75429655047498,0 -27.19175933495416,38.75454752863707,0 -27.19191993626678,38.75479015884098,0 -27.19208091752984,38.75502460732288,0 -27.192242502459,38.75525119960124,0 -27.19240485590335,38.75547016645181,0 -27.19256856001288,38.75568225827979,0 -27.1927332979391,38.75588702995424,0 -27.1928991722732,38.75608460888751,0 -27.19306626401485,38.75627509142465,0 -27.19323466458258,38.75645858039785,0 -27.19340441657599,38.75663512083438,0 -27.19357557504235,38.75680476993404,0 -27.1937481851995,38.75696757245773,0 -27.19388392627992,38.75708952228743,0 -27.19402447166428,38.75721018166413,0 -27.19416986398792,38.75732958721191,0 -27.19432015241801,38.75744777932847,0 -27.19447538229895,38.75756479408308,0 -27.19463562296278,38.75768068413245,0 -27.19480094163777,38.75779549812821,0 -27.19497141698036,38.75790929072318,0 -27.19514699246085,38.75802202956064,0 -27.19532790306864,38.75813387074013,0 -27.19551425944149,38.75824488270707,0 -27.19570619394773,38.75835514435258,0 -27.19590382041019,38.75846472207052,0 -27.19610734586227,38.75857373162107,0 -27.19631696650761,38.75868227817816,0 -27.19653292565542,38.75879048780182,0 -27.19674500547676,38.75889348184752,0 -27.19696339557622,38.7589964392327,0 -27.19718843275785,38.75909951888527,0 -27.19742055497301,38.75920292152231,0 -27.19766006363366,38.75930678513658,0 -27.19790782657081,38.75941148961325,0 -27.19816463994297,38.75951737183826,0 -27.19843166174795,38.75962490953542,0 -27.19869374761387,38.75972821456309,0 -27.19896800945704,38.75983423002789,0 -27.19956451933064,38.76005879736322,0 -27.20020745786083,38.76029425476107,0 -27.20127730454097,38.76067983838667,0 -27.20213792296446,38.76099290811818,0 -27.2023928100492,38.76108222768019,0 -27.20262239976221,38.76115933469348,0 -27.20286020288683,38.76123482981174,0 -27.20308462763572,38.76130111947482,0 -27.20329940634833,38.76135930328415,0 -27.2035065114064,38.76140990991657,0 -27.20365878412257,38.76144281846212,0 -27.20381521940362,38.76147234123062,0 -27.20397614125505,38.76149853965603,0 -27.20414197475981,38.76152148315763,0 -27.20431299593492,38.76154121762384,0 -27.20449007965394,38.761557851335,0 -27.20467402406253,38.76157146022142,0 -27.20486603547594,38.76158213414728,0 -27.20503161463754,38.76158879266106,0 -27.20520511468341,38.76159356839192,0 -27.20538828291242,38.7615965119159,0 -27.20558452343885,38.76159767914347,0 -27.2059570138544,38.76159576027936,0 -27.20690493175153,38.76158388679722,0 -27.20717617194003,38.76158341550114,0 -27.20741954623249,38.76158578555167,0 -27.20768857115959,38.76159251296968,0 -27.2079392650607,38.76160365290369,0 -27.20817621630361,38.76161941236951,0 -27.20840177948039,38.76163995438941,0 -27.20863659906837,38.76166333938746,0 -27.2088844416751,38.76168589860983,0 -27.20914750528611,38.76170783381119,0 -27.20942975747597,38.76172947671074,0 -27.21004649111201,38.76177184329645,0 -27.211387844904,38.76185518280558,0 -27.21198039994705,38.76189449790486,0 -27.21260011963658,38.76194118325222,0 -27.21288298514241,38.76196518578679,0 -27.21315251186309,38.7619900140293,0 -27.21347171488156,38.76202227767427,0 -27.21377628425775,38.76205638337047,0 -27.21406817970995,38.76209255118915,0 -27.21434865911291,38.76213093798069,0 -27.21461910027803,38.76217173966512,0 -27.21487989118764,38.76221502255253,0 -27.21513166774199,38.76226089239247,0 -27.21537490317672,38.76230943568755,0 -27.21564740732963,38.76236932172162,0 -27.21590943046805,38.76243304034955,0 -27.21616140182688,38.76250069614871,0 -27.21640365224087,38.76257237820708,0 -27.21663653008148,38.76264819231642,0 -27.21686020535487,38.76272819667371,0 -27.21696865851239,38.7627697937651,0 -27.21707488380965,38.76281246497747,0 -27.21717890196053,38.76285621863477,0 -27.21728073166237,38.76290106260519,0 -27.21738050522698,38.76294705874307,0 -27.21747811906872,38.76299416296141,0 -27.21757358842031,38.76304238261334,0 -27.2176669271189,38.7630917246904,0 -27.21775814927261,38.76314219669,0 -27.2178472657872,38.76319380468652,0 -27.21793428799314,38.76324655524346,0 -27.21801922623017,38.76330045463076,0 -27.21810209649426,38.76335551328128,0 -27.21818290125339,38.76341173312403,0 -27.2182616490192,38.76346912008272,0 -27.21833834758296,38.76352767983706,0 -27.2184130048128,38.76358741842248,0 -27.2184856269833,38.76364834088865,0 -27.21855622052072,38.76371045262808,0 -27.21862479131987,38.76377375882895,0 -27.21989343129459,38.76424452530732,0 -27.22058861137451,38.76430712329192,0 -27.22195921069074,38.7647302140244,0 -27.22319631341718,38.76489667044568,0 -27.22342341902639,38.76486390573221,0 -27.22365107622536,38.76482697181515,0 -27.22387886161328,38.76478593740173,0 -27.22410635938666,38.76474087741008,0 -27.22433314562719,38.76469187617427,0 -27.22455883468894,38.76463901738754,0 -27.22478303545046,38.76458239268322,0 -27.22500537327031,38.76452209670808,0 -27.22522532573974,38.76445827566675,0 -27.22544270825688,38.76439098769847,0 -27.22565718668891,38.76432033626512,0 -27.2258684477563,38.76424642459921,0 -27.22607617143541,38.76416936529355,0 -27.22628009690855,38.76408925574351,0 -27.22647995624165,38.76400620124186,0 -27.22667550259031,38.76392030440771,0 -27.2268653247277,38.76383222938105,0 -27.22705044451107,38.7637415472263,0 -27.22723066206521,38.76364835589089,0 -27.22740579570754,38.76355274936291,0 -27.22757566127957,38.76345482880872,0 -27.22774011761683,38.76335467625788,0 -27.22789901941038,38.76325238023821,0 -27.22805223609833,38.76314802484016,0 -27.22819956122714,38.76304175591292,0 -27.22834097718865,38.76293359159893,0 -27.22847638276206,38.76282360935297,0 -27.22860568796594,38.76271188229949,0 -27.22872880322408,38.76259848842702,0 -27.22884566196876,38.76248348966822,0 -27.2289561965635,38.7623669526166,0 -27.2290603476076,38.76224893993581,0 -27.22916416308541,38.76212500273745,0 -27.22926183295012,38.76200464226915,0 -27.22935377550842,38.76188734237489,0 -27.22944016572149,38.76177287842022,0 -27.22952120670722,38.76166097438458,0 -27.22959687086524,38.76155166082477,0 -27.22966720119704,38.76144487549412,0 -27.22973221779323,38.76134058768454,0 -27.22979204294771,38.76123858399468,0 -27.22984655358366,38.76113905545747,0 -27.22989575284136,38.76104199630272,0 -27.22993964068622,38.76094740653979,0 -27.22997821760755,38.76085528463599,0 -27.23001148030567,38.76076563791554,0 -27.23003942704447,38.76067847104433,0 -27.23006205599626,38.76059378969932,0 -27.23008224480448,38.76049420209326,0 -27.23009571140858,38.76039224443827,0 -27.23010245055032,38.76028795629664,0 -27.23010245930522,38.76018138247322,0 -27.23009573704436,38.76007256444282,0 -27.23008228689724,38.75996156272502,0 -27.23006211586159,38.75984843544313,0 -27.23003523570918,38.75973324884176,0 -27.23000163288804,38.7596159776483,0 -27.22996134975274,38.75949679592467,0 -27.22991441559584,38.75937579052778,0 -27.22986086903076,38.7592530611582,0 -27.2298007478338,38.75912869734231,0 -27.22973411825025,38.75900283871612,0 -27.22966104982752,38.75887561683275,0 -27.22958162977788,38.75874718368901,0 -27.22949424439801,38.75861519382224,0 -27.22940049631659,38.75848231410811,0 -27.22930053622337,38.75834875836905,0 -27.22919455007661,38.75821477525655,0 -27.22908270574516,38.75808058120255,0 -27.22896529845415,38.75794653440053,0 -27.22884261624562,38.75781296400629,0 -27.22871500882411,38.75768025101179,0 -27.2285821768293,38.75754813035579,0 -27.2284452334991,38.75741775404427,0 -27.22830469764399,38.75728961636924,0 -27.22816118250114,38.75716427679655,0 -27.22801524597477,38.75704222879784,0 -27.22786775945595,38.75692420724088,0 -27.22771954098796,38.7568108670918,0 -27.22757150649284,38.75670290910314,0 -27.22748636660605,38.75664399387976,0 -27.22739802834103,38.75658613017361,0 -27.22730647181752,38.75652930495262,0 -27.2272116738755,38.75647350383387,0 -27.22711361333802,38.75641871416088,0 -27.22701225683193,38.75636491710361,0 -27.22690757206583,38.75631209550845,0 -27.22679952091296,38.75626023012538,0 -27.22668813538772,38.75620933379,0 -27.22657329652365,38.75615934969058,0 -27.22645494976328,38.75611025405822,0 -27.22633302931013,38.75606201957884,0 -27.22620747914698,38.75601462361523,0 -27.22607819466766,38.75596802622086,0 -27.22594507703015,38.75592219172988,0 -27.22580800290418,38.75587707764512,0 -27.22553275377093,38.75579217328139,0 -27.22524097489471,38.7557093391948,0 -27.2249308629906,38.75562805899875,0 -27.22459900167121,38.75554743495589,0 -27.22425679602642,38.75546984479713,0 -27.2238797615576,38.75538938622604,0 -27.22346805230186,38.75530576112888,0 -27.22285713363417,38.75518557553466,0 -27.22273880162207,38.75516341041003,0 -27.22261905235743,38.75514305989178,0 -27.22249784244803,38.75512451659706,0 -27.22237512346829,38.75510777310988,0 -27.22225085087667,38.75509282318264,0 -27.22212496062098,38.75507965894282,0 -27.22199739161152,38.75506827398936,0 -27.22186807450037,38.75505866212193,0 -27.22173704219573,38.75505082346169,0 -27.22160410619241,38.75504474444183,0 -27.22146917580504,38.75504042089443,0 -27.22133214563438,38.7550378494243,0 -27.22105135510734,38.75503795485538,0 -27.22076056350371,38.75504506049292,0 -27.22045052501106,38.75505965057243,0 -27.22012620262018,38.75508174286652,0 -27.21978472253249,38.75511152714283,0 -27.21942076367937,38.75514946442723,0 -27.21906269091839,38.75519184420089,0 -27.21866536896416,38.75524334017318,0 -27.21825807358898,38.75529946216471,0 -27.21714575403393,38.75545703074756,0 -27.21680810901854,38.75550250985474,0 -27.21650544947811,38.75554099161111,0 -27.21615904990807,38.7555814802372,0 -27.21583635589131,38.75561491187575,0 -27.2155310292626,38.75564194019874,0 -27.21523987673553,38.75566284164684,0 -27.21506301544038,38.75567292581636,0 -27.21489034342354,38.7556806857178,0 -27.21472148285507,38.75568613824294,0 -27.21455613817001,38.75568929282117,0 -27.21439399105821,38.75569015436305,0 -27.21423488163116,38.75568872251827,0 -27.21407861440703,38.7556849954845,0 -27.21392502727156,38.75567896934258,0 -27.21377374607321,38.75567062395614,0 -27.21362487708065,38.75565995963143,0 -27.21347830310861,38.75564696794903,0 -27.21333392348635,38.7556316399567,0 -27.21319163198999,38.75561396401979,0 -27.21305135968318,38.75559393120922,0 -27.21291303000524,38.75557153057543,0 -27.2127765756002,38.75554675119311,0 -27.21251631629161,38.7554949268545,0 -27.21225363458573,38.75543875004352,0 -27.21198865367704,38.75537824708805,0 -27.21172150923217,38.75531344894795,0 -27.21145232782,38.75524438597811,0 -27.21118128134138,38.75517110194122,0 -27.21090853377009,38.75509364114752,0 -27.21063426598307,38.75501205494422,0 -27.21035847158949,38.75492633749933,0 -27.21008155361405,38.75483661016293,0 -27.20980373084151,38.75474294379406,0 -27.20952524464242,38.75464541973989,0 -27.20924631793469,38.7545441154607,0 -27.20896725763746,38.75443914182665,0 -27.20868835343847,38.75433060776715,0 -27.20840992403331,38.75421863726161,0 -27.20769562293044,38.75392784301047,0 -27.20732586690871,38.7537753486243,0 -27.20696883583812,38.75362444356544,0 -27.20664928930044,38.75348483184322,0 -27.20633356317282,38.75334121191111,0 -27.20604110243523,38.75320175418018,0 -27.20576785400426,38.75306452281443,0 -27.20551172378798,38.75292845981299,0 -27.20538294118349,38.75285685613757,0 -27.20525831047592,38.75278524921355,0 -27.20513768432756,38.7527135543401,0 -27.20502094505859,38.75264170151356,0 -27.20490796874336,38.75256961378955,0 -27.20479868890471,38.75249724805263,0 -27.2046930277643,38.75242455277024,0 -27.20459092088181,38.75235148357395,0 -27.20449223032952,38.75227793815028,0 -27.20439699205383,38.75220393954395,0 -27.20430516121368,38.75212945289624,0 -27.20421669982986,38.75205444737988,0 -27.20413156893142,38.75197888967769,0 -27.20404974351146,38.75190275730793,0 -27.20397119646857,38.75182602504189,0 -27.20389590454217,38.75174867014133,0 -27.2038032722653,38.75164927934345,0 -27.20371205716558,38.75154794255549,0 -27.20362244422915,38.75144486533927,0 -27.20353460371585,38.75134024358491,0 -27.20344871010032,38.75123428595413,0 -27.20336489767457,38.751127158983,0 -27.20328330561591,38.75101904061498,0 -27.20320405925893,38.75091009698519,0 -27.20312736692947,38.75080062183142,0 -27.20305323660019,38.75069063411122,0 -27.20298176581814,38.75058027860425,0 -27.20291304096864,38.75046968874764,0 -27.20284714926098,38.75035900569682,0 -27.20278415327648,38.75024833543289,0 -27.20272411780972,38.75013779183151,0 -27.20266709941629,38.75002747907958,0 -27.20261349455827,38.74991821943567,0 -27.2025629622185,38.74980937605897,0 -27.20251554231642,38.74970103497562,0 -27.20247126918403,38.74959327467287,0 -27.20243017632009,38.74948617743064,0 -27.20239228698295,38.7493798046706,0 -27.20235762454166,38.74927422204349,0 -27.20232620862688,38.74916948939515,0 -27.20229806851995,38.74906571122302,0 -27.20227320324096,38.7489628915943,0 -27.20225162483473,38.74886108036473,0 -27.20223334292747,38.74876032301423,0 -27.20221836590464,38.74866066679493,0 -27.20220669895842,38.74856214752695,0 -27.20219834656987,38.74846480313035,0 -27.20219331170127,38.74836866824995,0 -27.20219156754159,38.7482600615616,0 -27.20219391777775,38.7481488062504,0 -27.202200363247,38.7480348606262,0 -27.20221090692009,38.7479181715554,0 -27.20222555140632,38.74779869897152,0 -27.20224430760577,38.74767634599716,0 -27.20226718902632,38.74755102387105,0 -27.20229421731501,38.74742261362131,0 -27.20232525373886,38.74729164842944,0 -27.20236046840027,38.74715730174071,0 -27.20239991900712,38.74701935226717,0 -27.20244369865245,38.74687747377563,0 -27.2024918270921,38.74673156991174,0 -27.20254459506704,38.74658073060301,0 -27.20260227698789,38.74642416654263,0 -27.20266542187406,38.74626038510306,0 -27.20273116348612,38.74610052651072,0 -27.20280305615378,38.74593946509002,0 -27.20288109460285,38.74577721266024,0 -27.20296527289742,38.74561378156646,0 -27.20305558477237,38.74544918401436,0 -27.20315202285818,38.74528343347493,0 -27.20325457942054,38.74511654324216,0 -27.20336324611283,38.74494852689993,0 -27.20347801173076,38.74477940152296,0 -27.20359886910383,38.7446091774435,0 -27.20372580858857,38.74443786823923,0 -27.20385882066564,38.74426548675425,0 -27.20399789363463,38.74409204798727,0 -27.20414302119024,38.74391755964764,0 -27.20429419578522,38.74374203078789,0 -27.20445141368811,38.74356546572653,0 -27.20457408417997,38.74343279764354,0 -27.20470229341925,38.74329981451641,0 -27.2048361304993,38.74316642384517,0 -27.20497570726371,38.74303251408819,0 -27.20512111405155,38.74289799662518,0 -27.2052725463288,38.74276268878018,0 -27.20543018915907,38.74262642501615,0 -27.20559428655058,38.7424889942814,0 -27.20576390448659,38.74235113425566,0 -27.2059405443903,38.74221158198919,0 -27.20612465204016,38.74206998482368,0 -27.20631687470096,38.74192584462315,0 -27.20651743659165,38.74177897787457,0 -27.20672808564627,38.74162809024416,0 -27.20695037912797,38.74147206369535,0 -27.20718726484286,38.74130882786299,0 -27.20732820641054,38.74121371826883,0 -27.20747179481127,38.74111920610778,0 -27.20761805803761,38.74102527294993,0 -27.20776702729354,38.74093189875109,0 -27.20791873173637,38.7408390651435,0 -27.20807321216791,38.74074674706927,0 -27.20823050791561,38.74065492101948,0 -27.20839066329235,38.7405635611193,0 -27.20871962846364,38.74038219359865,0 -27.20906066276512,38.7402023343686,0 -27.20941428688408,38.74002370840837,0 -27.20978119496135,38.73984596477884,0 -27.21015822708959,38.73967052181659,0 -27.21055015542939,38.73949505114118,0 -27.21095827571086,38.73931897140935,0 -27.21138453509575,38.73914144172982,0 -27.21182920533272,38.73896230379676,0 -27.21229822716684,38.73877912240273,0 -27.21279675852824,38.73858987384826,0 -27.21333615660776,38.73839024283047,0 -27.21376172982205,38.73823596911061,0 -27.21416127871337,38.73809419375495,0 -27.21454226808221,38.73796227001463,0 -27.21490836135915,38.73783893373751,0 -27.2152637971105,38.73772277834915,0 -27.21560894876841,38.73761370449186,0 -27.21594531203622,38.73751123992615,0 -27.21627391358967,38.7374150725348,0 -27.21659851678139,38.73732415600315,0 -27.21691678262733,38.73723920193629,0 -27.21722929699216,38.73716005410939,0 -27.21753651089744,38.73708659850394,0 -27.21783891585998,38.73701871965238,0 -27.21813674261458,38.73695636787791,0 -27.2184302826639,38.73689948222652,0 -27.21871977434832,38.73684801660036,0 -27.21895171876972,38.73681156638482,0 -27.21918910374784,38.73677998942109,0 -27.2194323638909,38.73675322758565,0 -27.21968205775646,38.73673121919121,0 -27.2199385734472,38.73671392195674,0 -27.22020299780912,38.73670125487146,0 -27.22047632455087,38.73669316938589,0 -27.22075999222311,38.73668962230815,0 -27.22103035079176,38.73669033490435,0 -27.22131297789233,38.73669483896878,0 -27.22161052262821,38.73670317305574,0 -27.22192798028732,38.73671547523463,0 -27.22222836528235,38.73672973840679,0 -27.22256190309908,38.73674784380629,0 -27.22379701714941,38.73682299721776,0 -27.22430807281869,38.736851409441,0 -27.22458318227604,38.7368645418598,0 -27.22484005854253,38.73687493925847,0 -27.22508365795945,38.73688280098534,0 -27.22531649348318,38.7368882055034,0 -27.22559444827763,38.73689156732114,0 -27.22586115855664,38.73689121330065,0 -27.22611847564806,38.73688714028162,0 -27.2263676113577,38.73687932797655,0 -27.22660990218558,38.73686772623709,0 -27.22684575441772,38.73685230697102,0 -27.2270758096284,38.73683302799876,0 -27.22730055559091,38.73680984812884,0 -27.22819205708436,38.7367147688518,0 -27.22848502506884,38.73668207235845,0 -27.22881813650936,38.7366409681002,0 -27.2291146117559,38.73659912513311,0 -27.22927102951808,38.73657445280797,0 -27.22942096966712,38.73654879796892,0 -27.22956531715521,38.73652200887563,0 -27.22970466277073,38.73649397538636,0 -27.22983965269684,38.73646456361227,0 -27.22997049495991,38.736433724138,0 -27.23009750560144,38.7364013823567,0 -27.23022092559832,38.7363674767517,0 -27.23053122157704,38.73627789197058,0 -27.23078708431078,38.73620132368056,0 -27.23101964603103,38.73612844829799,0 -27.23123370028618,38.73605770034509,0 -27.23143727731759,38.73598630561587,0 -27.2316280132297,38.73591495987478,0 -27.23180737807231,38.73584311206619,0 -27.23197618672498,38.73577043364149,0 -27.23213873225653,38.73569488298691,0 -27.2322913238705,38.73561796817225,0 -27.23243431155359,38.73553951241135,0 -27.23256792942751,38.73545938669044,0 -27.23269242193803,38.73537743948715,0 -27.23280786483902,38.73529361555166,0 -27.23291437040012,38.73520783319302,0 -27.2329642974678,38.73516418699469,0 -27.23301201923165,38.7351200272499,0 -27.23306829120246,38.73506501985386,0 -27.23312404142363,38.73500772700148,0 -27.23317915878761,38.73494826285393,0 -27.23323352945381,38.7348867502064,0 -27.23328704287462,38.73482331384748,0 -27.23333958081705,38.73475809364595,0 -27.23339102951995,38.73469123081595,0 -27.23344127597692,38.73462287220863,0 -27.23349021240637,38.73455316416633,0 -27.2335377274564,38.73448226500245,0 -27.23358371621097,38.73441033127563,0 -27.23362807800811,38.73433752044192,0 -27.23367071430642,38.73426399451703,0 -27.23371153644111,38.73418990668946,0 -27.23375045835264,38.73411541317645,0 -27.23378740047637,38.73404066628424,0 -27.23382208179722,38.73396627356245,0 -27.23385466777747,38.733891921245,0 -27.23388509740588,38.73381774858966,0 -27.23391331644657,38.73374388784502,0 -27.23393927302198,38.73367047575403,0 -27.2339629276505,38.73359762502147,0 -27.23398424241522,38.7335254524913,0 -27.23400318524876,38.7334540668213,0 -27.23401971325933,38.73338364183916,0 -27.23403382387588,38.7333142024554,0 -27.23404549845235,38.73324584053528,0 -27.23405472264873,38.73317864018163,0 -27.23406148494434,38.7331126879663,0 -27.23406577893195,38.73304804998885,0 -27.23406760004318,38.7329847953193,0 -27.23406694649944,38.73292298647684,0 -27.23406331721997,38.73285881999264,0 -27.23405637234477,38.73279365942605,0 -27.23404611244382,38.73272751014282,0 -27.23403253841576,38.73266037794846,0 -27.23401565135128,38.73259226841237,0 -27.23399545296224,38.73252318857902,0 -27.23397194525198,38.73245314530832,0 -27.2339451307213,38.73238214605815,0 -27.23391500954265,38.73231019231194,0 -27.23388158746421,38.7322372987147,0 -27.23384486855942,38.73216347415743,0 -27.23380485766177,38.73208872836367,0 -27.23376155962625,38.73201307051325,0 -27.23371498135025,38.73193651275955,0 -27.23366512995688,38.73185906681715,0 -27.23361201374894,38.73178074559065,0 -27.23355555662827,38.73170144556984,0 -27.23349584500429,38.73162129632509,0 -27.23343289065798,38.73154031367739,0 -27.23336670724459,38.73145851519915,0 -27.23329730780431,38.73137591714445,0 -27.23322471141066,38.7312925423445,0 -27.23314893699011,38.73120841254499,0 -27.23307000644126,38.73112355206717,0 -27.23290271920012,38.73095168799866,0 -27.2327231286645,38.73077724138637,0 -27.23253151259287,38.73060048217241,0 -27.23232820795162,38.73042172147764,0 -27.23224050201312,38.73034871141126,0 -27.23214899633253,38.73027718480844,0 -27.23205366144017,38.73020711861378,0 -27.23195446285115,38.7301384874656,0 -27.23185136894272,38.73007126910152,0 -27.23174432955975,38.73000543045318,0 -27.23163329591469,38.72994094148312,0 -27.23151821005815,38.72987776850983,0 -27.23139912515887,38.72981593556367,0 -27.23127585585955,38.72975534143007,0 -27.23114831778134,38.72969594458559,0 -27.23101640817632,38.72963769714083,0 -27.23088004069267,38.72958055997412,0 -27.23073904766966,38.72952446188838,0 -27.23059327040099,38.72946933965034,0 -27.23044250732519,38.72941511697583,0 -27.23029917264877,38.72936594481315,0 -27.23015119082042,38.72931738506033,0 -27.22999829894501,38.72926935131604,0 -27.22984014661735,38.72922173339542,0 -27.22967651370138,38.72917446144377,0 -27.22950665685443,38.72912731732721,0 -27.22914519787789,38.72903256882321,0 -27.22880896832167,38.72894993864969,0 -27.22843217727532,38.72886197357362,0 -27.22807311060727,38.72878118505856,0 -27.22727463813834,38.72860471990115,0 -27.22692150829699,38.72852463893736,0 -27.22672982860031,38.72848132108058,0 -27.22653596189926,38.72843946345592,0 -27.22633989383446,38.72839906296164,0 -27.22614160859889,38.72836011633935,0 -27.22594109138603,38.72832262065404,0 -27.22573832212856,38.72828657212703,0 -27.22532594838135,38.72821880267054,0 -27.22490436053156,38.72815678594069,0 -27.22447330594686,38.72810048362602,0 -27.22403254976543,38.72804986494485,0 -27.22358179521283,38.72800489573011,0 -27.22312179682344,38.72796562786068,0 -27.22265108612648,38.72793191315536,0 -27.22216917602205,38.7279037164822,0 -27.22167541415607,38.72788099948895,0 -27.22116939555698,38.72786373699413,0 -27.22064973443152,38.72785187544503,0 -27.22011518585265,38.72784538562367,0 -27.21956387616482,38.7278442442497,0 -27.21937535843335,38.72784607541918,0 -27.21918350324843,38.72785056119255,0 -27.21898799836946,38.72785770875101,0 -27.21878844959461,38.72786753241329,0 -27.21858457114082,38.72788004322469,0 -27.21837563022007,38.72789528324012,0 -27.21816095795974,38.72791330090616,0 -27.21793961766392,38.72793417460321,0 -27.21770996983121,38.7279580658283,0 -27.21747078344444,38.72798510954571,0 -27.21721991878163,38.7280155457453,0 -27.21695341626634,38.72804985382545,0 -27.21640646697962,38.72812505002665,0 -27.21531656643782,38.72828269384042,0 -27.21485808682466,38.72834712583853,0 -27.21437730694547,38.72841042491487,0 -27.21394590721061,38.7284617009074,0 -27.21369172647983,38.72848878902629,0 -27.21344738073282,38.72851226800981,0 -27.213211132944,38.72853230425152,0 -27.21298184662648,38.72854899332455,0 -27.21275826367804,38.72856242079716,0 -27.21254000245888,38.72857260330896,0 -27.2123264579181,38.7285795689173,0 -27.21211716896183,38.72858333243544,0 -27.21191178364828,38.72858398079797,0 -27.21170213810134,38.72858168732233,0 -27.21148777834984,38.72857644725757,0 -27.2112681084421,38.72856824619657,0 -27.21104275263988,38.72855707606266,0 -27.21081047076063,38.72854288107239,0 -27.21057014200966,38.72852559350278,0 -27.21032005229394,38.72850509054234,0 -27.20989580170985,38.72846531708439,0 -27.20942275766831,38.72841517878578,0 -27.20897183773752,38.72836356322252,0 -27.20790187706404,38.72823689383338,0 -27.20736683185844,38.7281771743367,0 -27.20686318273106,38.72812681271604,0 -27.20663030004683,38.72810616680768,0 -27.2064067056012,38.72808824027405,0 -27.20619485005747,38.7280731729233,0 -27.20598930151378,38.72806052039369,0 -27.20578919423862,38.72805022959544,0 -27.20559390689032,38.72804226886069,0 -27.20540275937194,38.72803661293088,0 -27.20521548267496,38.72803325640512,0 -27.20503170847152,38.72803219276135,0 -27.2048511443658,38.72803342040882,0 -27.20352543117845,38.72804930926957,0 -27.20312423872325,38.72805691552526,0 -27.20276414231999,38.72806646599042,0 -27.20239605950555,38.72807975519181,0 -27.20205128101975,38.72809621243195,0 -27.20172431743782,38.7281161019623,0 -27.20141230158531,38.72813960264707,0 -27.20109333088315,38.72816885189022,0 -27.20078703823539,38.72820257008047,0 -27.20049200252536,38.7282409143512,0 -27.2002072518777,38.72828401204052,0 -27.19993172834993,38.72833203171074,0 -27.19966506957669,38.7283850453917,0 -27.199406745698,38.72844315868621,0 -27.19915635059865,38.72850646330198,0 -27.19881126590998,38.72860172281514,0 -27.19847665138304,38.72870016127855,0 -27.19815242588716,38.72880180265089,0 -27.19783856892666,38.72890665350963,0 -27.19753504754147,38.72901472580588,0 -27.19724190621708,38.72912600469596,0 -27.19695916540339,38.72924048243333,0 -27.19668685285686,38.72935814780766,0 -27.19655459467225,38.72941818192624,0 -27.19642495534874,38.72947900841965,0 -27.19629793858677,38.72954062555171,0 -27.19617354808323,38.72960303152919,0 -27.19605178745304,38.72966622453915,0 -27.19593266029739,38.72973020271309,0 -27.19581617011236,38.72979496417342,0 -27.19570232030211,38.7298605070276,0 -27.19559111452125,38.72992682916082,0 -27.19548255561034,38.72999392886809,0 -27.19537664667458,38.73006180422997,0 -27.19527339069416,38.73013045333636,0 -27.19517279061072,38.73019987422899,0 -27.19507484911421,38.73027006504913,0 -27.19497956886093,38.73034102389292,0 -27.19488695237941,38.73041274887706,0 -27.1947556736515,38.73051989954612,0 -27.19462259072232,38.73063540855485,0 -27.19448657181808,38.73076025214808,0 -27.19434557187086,38.73089630415937,0 -27.19420763476988,38.73103512341569,0 -27.19405736187357,38.73119158953062,0 -27.19390395498732,38.73135532742279,0 -27.19361049416127,38.73167262123791,0 -27.19333159573717,38.73197732520205,0 -27.19307590425645,38.7322656104907,0 -27.19283904556014,38.7325424144527,0 -27.19272699734307,38.73267730834714,0 -27.19261890987709,38.73281021471528,0 -27.19251420613024,38.732941860083,0 -27.19241317716488,38.73307189615441,0 -27.19231570043255,38.73320048072804,0 -27.1922216785665,38.73332774232475,0 -27.19213100938845,38.73345382015334,0 -27.19204363865987,38.73357879058476,0 -27.19195950289905,38.73370274445715,0 -27.19187854979212,38.73382575888785,0 -27.19176834342291,38.73400058134553,0 -27.19166075422111,38.73418068406333,0 -27.19155562649027,38.73436632726646,0 -27.19145277084814,38.73455784505001,0 -27.19135205216198,38.73475547776442,0 -27.19125313926173,38.73495986391695,0 -27.1911557464736,38.73517159242277,0 -27.19105948941721,38.73539149790584,0 -27.19096762401781,38.73561152112193,0 -27.19087583131253,38.73584138990825,0 -27.19078343478999,38.73608279149774,0 -27.19068928265553,38.73633873125876,0 -27.19059575620947,38.73660215087936,0 -27.1904961860694,38.73689129028942,0 -27.19038900434887,38.73721025048408,0 -27.19023953598945,38.73766223565934,0 -27.19014282989824,38.73796145879952,0 -27.19004992696689,38.73826119186059,0 -27.18996086879534,38.73856130060526,0 -27.18987569374647,38.73886165573362,0 -27.18979443940321,38.73916212429403,0 -27.18971713717033,38.7394625897125,0 -27.18964381795725,38.73976293182125,0 -27.1895745098963,38.74006303535153,0 -27.18950924924097,38.74036273918172,0 -27.18944804813731,38.74066198313125,0 -27.18939092829013,38.74096066104318,0 -27.1893379091035,38.74125867142071,0 -27.18928900901984,38.74155591002207,0 -27.18924424274956,38.74185228679947,0 -27.18920362431416,38.74214770888524,0 -27.18916716588518,38.74244208771155,0 -27.18913491067755,38.74273502179347,0 -27.18910682627396,38.74302674622167,0 -27.18908292040367,38.7433171806552,0 -27.18906319935659,38.74360624861283,0 -27.18904766839659,38.74389387169673,0 -27.18903633107049,38.74417998264432,0 -27.18902919011995,38.7444645121502,0 -27.18902624719367,38.74474739432819,0 -27.18902750260958,38.7450285360118,0 -27.18903295557045,38.74530790543874,0 -27.18904260491098,38.74558544311824,0 -27.18905644866234,38.74586109254859,0 -27.18907448385457,38.74613479595332,0 -27.18909670715709,38.74640650383348,0 -27.18912311440303,38.74667616528966,0 -27.18915370085709,38.74694373200657,0</coordinates></LinearRing></outerBoundaryIs>
        </Polygon>
        <Polygon>
          <extrude>0</extrude>          <altitudeMode>clampToGround</altitudeMode>
          <outerBoundaryIs><LinearRing><coordinates> -27.31335466247628,38.75681834181771,0 -27.31347263754066,38.75680439921104,0 -27.31359258438484,38.75678481009928,0 -27.31371477256905,38.75675953086393,0 -27.31383955347022,38.75672848911354,0 -27.31396715094441,38.75669164038747,0 -27.31409828685732,38.75664878698658,0 -27.31423361170734,38.7565997177942,0 -27.31437411398192,38.75654407530985,0 -27.31449023359031,38.756494868095,0 -27.31461143879549,38.75644076711552,0 -27.31473901605888,38.75638120150905,0 -27.31487549265206,38.75631499291126,0 -27.31512745290957,38.75618779470499,0 -27.31573748625387,38.75587181680292,0 -27.31590264510038,38.75578892509802,0 -27.31605221382963,38.75571631002639,0 -27.31620841577067,38.7556436904634,0 -27.31635594776431,38.75557875359208,0 -27.31649716308951,38.75552046559668,0 -27.31663332386954,38.75546830941613,0 -27.31676850863526,38.75542087276346,0 -27.31690016988464,38.75537920587026,0 -27.31702889916076,38.75534312203939,0 -27.31715511569614,38.75531250449089,0 -27.31727928308603,38.75528724689038,0 -27.31740157640413,38.75526731995471,0 -27.31752224243891,38.75525268366138,0 -27.31764147631527,38.75524331458639,0 -27.31776441280721,38.75523934546688,0 -27.31789424269286,38.75524105396055,0 -27.31803232632058,38.7552484507307,0 -27.3181813929824,38.75526167856326,0 -27.31831162250236,38.75527673098749,0 -27.31845737874284,38.7552964280957,0 -27.31893236100455,38.75536910310766,0 -27.31910206826074,38.75539348037214,0 -27.31926416430687,38.75541356097195,0 -27.31940982011115,38.75542766605693,0 -27.31955066789197,38.75543661286679,0 -27.31968235043428,38.75543977496452,0 -27.31980676193575,38.75543719531152,0 -27.31992494278,38.75542884752576,0 -27.32003949911977,38.75541630266837,0 -27.32015558294873,38.75540086465287,0 -27.32027303357262,38.75538255482752,0 -27.32039167920115,38.75536139995093,0 -27.32051135262224,38.75533742947951,0 -27.32063185574374,38.75531068273534,0 -27.32075299551727,38.75528120254879,0 -27.32087456960462,38.75524903814083,0 -27.32099644335559,38.75521422285092,0 -27.32111833103374,38.75517683602224,0 -27.32124001562222,38.75513694420941,0 -27.32136127498969,38.75509462022023,0 -27.32148188979071,38.75504994048017,0 -27.32160163040644,38.7550029899104,0 -27.32172027181494,38.75495385674076,0 -27.32183758975607,38.75490263384007,0 -27.32195329528445,38.75484944970522,0 -27.32206723966196,38.75479437507065,0 -27.32217920938914,38.75473751313945,0 -27.32228899755274,38.75467896899547,0 -27.32239639779874,38.75461885289536,0 -27.32250122313794,38.75455726972591,0 -27.32260328810298,38.75449432846497,0 -27.32270241783296,38.75443013696295,0 -27.32279838144896,38.75436484793536,0 -27.32289109158923,38.7542985241302,0 -27.32298040110375,38.75423127084409,0 -27.32306617483323,38.75416318988388,0 -27.32314827866271,38.75409438821464,0 -27.32322660521824,38.75402495635074,0 -27.32330104730268,38.75395498934973,0 -27.32337150891485,38.75388457747709,0 -27.32347508241076,38.75377276436909,0 -27.32357604285987,38.75365374926701,0 -27.32367383137829,38.75352819059062,0 -27.32376786758734,38.75339683304695,0 -27.32385760424827,38.75326043619975,0 -27.32394244639063,38.7531198991725,0 -27.32402185139398,38.75297612080094,0 -27.32409530771055,38.75283002720277,0 -27.32416224316122,38.75268279033394,0 -27.32422236247093,38.75253509674896,0 -27.32427529833644,38.75238784949127,0 -27.32432074540329,38.75224189858043,0 -27.32435843244934,38.75209813362996,0 -27.32438819137429,38.75195721819596,0 -27.32440004978367,38.75188805066799,0 -27.32440987588419,38.75181984686225,0 -27.32441765874448,38.75175268274103,0 -27.32442339018915,38.75168662896576,0 -27.32442856326067,38.75158470897015,0 -27.32442968759117,38.75147945045948,0 -27.32442675884417,38.75137125555283,0 -27.32441978848062,38.75126054969484,0 -27.32440880363652,38.75114776747395,0 -27.32439384840151,38.75103336402261,0 -27.32437498255356,38.7509177964108,0 -27.32435228054495,38.75080152064398,0 -27.32432586604835,38.7506851348338,0 -27.32429581307588,38.75056893484295,0 -27.324262233021,38.75045335107321,0 -27.32422524412463,38.75033879027787,0 -27.32418498395639,38.75022567384121,0 -27.32414157265424,38.75011433501386,0 -27.32409514502478,38.75000511928333,0 -27.3240458340606,38.74989833926349,0 -27.32399476121825,38.74979618437102,0 -27.32394116566003,38.74969690765881,0 -27.32388517244372,38.74960074060405,0 -27.32382690015661,38.74950788670755,0 -27.32376648086148,38.74941855391878,0 -27.32370401234906,38.74933288442181,0 -27.32363960403489,38.74925102815207,0 -27.32357335748459,38.74917311406756,0 -27.32350548141565,38.74909937307256,0 -27.32343596407958,38.74902977820297,0 -27.32336489515646,38.74896441916118,0 -27.32329235706771,38.74890337166443,0 -27.32321843970616,38.74884671024161,0 -27.32314320759302,38.74879448324312,0 -27.32306673241998,38.74874674038647,0 -27.32298907986027,38.74870352261557,0 -27.32290217578751,38.74866133650063,0 -27.32280871087839,38.74862232914567,0 -27.32270852893327,38.7485864350117,0 -27.32260141349823,38.7485535762956,0 -27.32248722978316,38.74852370291924,0 -27.32236549297766,38.74849668000746,0 -27.32223574449029,38.74847240473815,0 -27.32209726489735,38.74845074186919,0 -27.32196958102619,38.74843398024026,0 -27.32183363434872,38.74841893282205,0 -27.32168811346507,38.74840545118058,0 -27.32153031657548,38.74839328348753,0 -27.3212365849454,38.74837542842192,0 -27.32060396777382,38.7483439787156,0 -27.32035829023117,38.74832849694168,0 -27.32022942390206,38.74832030861856,0 -27.32009800998389,38.74831428881455,0 -27.31996381727342,38.74831042681834,0 -27.31982655056007,38.74830871404114,0 -27.31968600237023,38.74830914478397,0 -27.3195416068292,38.74831171779487,0 -27.31939284803501,38.74831644190495,0 -27.31923898712811,38.7483233403317,0 -27.31893241646722,38.74834236280476,0 -27.31859299297422,38.74836996173153,0 -27.31824114691072,38.74840355240348,0 -27.31726679591566,38.74850313613501,0 -27.31696826300862,38.74852988645617,0 -27.31670057574291,38.74855020969838,0 -27.31639287598579,38.74856784103242,0 -27.31624722427881,38.74857359877389,0 -27.31610598997321,38.74857736295197,0 -27.3159684053817,38.74857915010893,0 -27.31583423656525,38.74857895918232,0 -27.31570311401294,38.74857678953483,0 -27.31557475620883,38.74857263635927,0 -27.3144670516376,38.74852921429623,0 -27.31412607151322,38.74851266779375,0 -27.31382000862824,38.74849475099066,0 -27.31350901045152,38.74847260755281,0 -27.31321810948001,38.74844742627382,0 -27.31294281135375,38.74841881569137,0 -27.31268077587655,38.74838652776489,0 -27.31241434848919,38.74834786068326,0 -27.3121594467606,38.74830456124437,0 -27.31191493293379,38.7482564354309,0 -27.31168003383678,38.74820332994305,0 -27.31156588212523,38.74817483785309,0 -27.31145391241223,38.74814504629224,0 -27.31134406481756,38.74811393931625,0 -27.31123628762514,38.74808150226598,0 -27.31113052667293,38.74804771866332,0 -27.31102674615798,38.74801257688957,0 -27.31092490678182,38.74797606362963,0 -27.31082497397606,38.74793816648023,0 -27.31057306264764,38.74783877761766,0 -27.31037642759501,38.74775795202667,0 -27.31020093182244,38.74768165090465,0 -27.31004305124704,38.7476082135833,0 -27.30989554756834,38.74753406299826,0 -27.30976100038716,38.74746025677835,0 -27.30963820923267,38.74738613445827,0 -27.30952653618323,38.74731130726339,0 -27.30945353655995,38.74725775576846,0 -27.30938159036019,38.74720127598626,0 -27.30931076494212,38.747141920763,0 -27.30924113208999,38.74707975022658,0 -27.30917275824952,38.74701482310318,0 -27.30910572768654,38.74694721880237,0 -27.30904011888207,38.74687701643692,0 -27.30897601462977,38.74680430455765,0 -27.30891343736286,38.7467291023071,0 -27.30885253896821,38.74665158575122,0 -27.3087934073647,38.74657186675277,0 -27.30873613381055,38.74649006829392,0 -27.30868080299121,38.74640631046655,0 -27.30862751482113,38.74632074363047,0 -27.308576361409,38.7462335156368,0 -27.30852743606364,38.74614478554274,0 -27.30848052013636,38.74605409991944,0 -27.30843604797835,38.74596223846982,0 -27.30839410911025,38.74586938606016,0 -27.30835479108542,38.7457757364774,0 -27.30831817486568,38.74568148185446,0 -27.30828434254652,38.74558683274888,0 -27.30825336824775,38.74549199649457,0 -27.30822532084202,38.74539718392679,0 -27.30820026126769,38.74530260000161,0 -27.30817824771912,38.74520846318322,0 -27.30815932942126,38.74511498400733,0 -27.30814354831973,38.74502236975572,0 -27.30813093972228,38.7449308290387,0 -27.308121529986,38.74484055493859,0 -27.30811533918755,38.74475174028495,0 -27.3081123801281,38.74466456901499,0 -27.30811244961887,38.74460579730719,0 -27.3081144690922,38.74454605604338,0 -27.30811843841313,38.74448534924058,0 -27.30812435729978,38.74442368122162,0 -27.30813222536632,38.74436105616518,0 -27.30814204197853,38.744297479238,0 -27.3081675175062,38.74416749040118,0 -27.30820077734292,38.74403375117723,0 -27.30824180760885,38.7438963197311,0 -27.30829059169405,38.74375525185606,0 -27.30834710682812,38.74361061351166,0 -27.30841138643161,38.74346234130046,0 -27.30848334558718,38.74331065056467,0 -27.30856293954206,38.74315563581094,0 -27.30865010974079,38.74299741120944,0 -27.30874480396289,38.74283607442696,0 -27.3088469186171,38.74267180459085,0 -27.30895634975594,38.74250476906906,0 -27.30907296804604,38.74233516543345,0 -27.30912227186705,38.74226782568071,0 -27.30917466964842,38.74220159020448,0 -27.30923018440027,38.74213642989037,0 -27.3092888431951,38.74207231293894,0 -27.30935067150846,38.74200921099808,0 -27.30941570873972,38.74194708338018,0 -27.30948399400142,38.74188589268606,0 -27.30955557376665,38.74182559724047,0 -27.30963041241592,38.74176622074788,0 -27.30970865091807,38.74170764535389,0 -27.30979035755186,38.74164981988483,0 -27.3098756152209,38.74159268562337,0 -27.30996449530374,38.74153619359193,0 -27.31005713140829,38.74148025778369,0 -27.31015365187298,38.74142480060672,0 -27.31025421888611,38.74136972879691,0 -27.31044438126851,38.74127206131982,0 -27.31064952084974,38.74117453413374,0 -27.31087159792433,38.74107620768588,0 -27.31111442739456,38.74097538918687,0 -27.31134678265971,38.74088388215337,0 -27.31160870451249,38.7407849204194,0 -27.31187487767112,38.74068733347298,0 -27.31259111536681,38.7404284325773,0 -27.31299412301243,38.74027743078932,0 -27.31320740047121,38.74019366262832,0 -27.31340384181161,38.74011313974084,0 -27.31358718853122,38.74003432616465,0 -27.31375930322706,38.73995641639189,0 -27.31395911131178,38.73986016779669,0 -27.31414556167444,38.7397634941561,0 -27.31431991614679,38.73966573986345,0 -27.31448297421077,38.73956645448396,0 -27.31456058024254,38.73951604244006,0 -27.31463557744348,38.73946510863868,0 -27.31470802220373,38.73941361476116,0 -27.31477796205401,38.73936152699643,0 -27.31484544597521,38.73930880853885,0 -27.31491050501026,38.73925543479606,0 -27.3149731730793,38.73920137792543,0 -27.31503347932398,38.73914661277203,0 -27.31523133399042,38.7389600908764,0 -27.31541264023316,38.7387848028687,0 -27.31558138314927,38.73861689227846,0 -27.31573920980016,38.73845471104833,0 -27.31588801715882,38.73829627111274,0 -27.3160277605219,38.73814157764047,0 -27.31615898442049,38.73799002714353,0 -27.3162820276179,38.73784122726016,0 -27.31639819020399,38.73769350618345,0 -27.31650648818161,38.73754800830724,0 -27.3166070761765,38.73740452561837,0 -27.31670006182791,38.73726290418618,0 -27.31678555485357,38.73712297303361,0 -27.31686359452939,38.7369846636055,0 -27.31693423353451,38.73684788238811,0 -27.3169975099145,38.73671255550619,0 -27.31704139905181,38.73661068603103,0 -27.31708347605499,38.73650743308185,0 -27.31712367230834,38.73640296506797,0 -27.31716192426979,38.7362974471628,0 -27.31719817000856,38.7361910508909,0 -27.31723235787149,38.73608392859949,0 -27.31726443757123,38.73597623790699,0 -27.31729436401742,38.73586813023329,0 -27.31732207734421,38.73575983051939,0 -27.31734756311503,38.73565140454383,0 -27.31737078881769,38.73554299069741,0 -27.31739172645055,38.73543471976666,0 -27.31741035001974,38.73532672764139,0 -27.31742664067404,38.73521912529007,0 -27.31744058087481,38.73511202866488,0 -27.31745215654988,38.73500554600395,0 -27.31746131426295,38.73490033512763,0 -27.31746811265668,38.73479593101158,0 -27.31747254573833,38.73469242590582,0 -27.3174746098652,38.73458990520743,0 -27.31747430348998,38.73448845727085,0 -27.31747162705663,38.73438815146192,0 -27.3174665825165,38.73428906044524,0 -27.31745917328703,38.73419125109066,0 -27.31744940933496,38.73409483208721,0 -27.31743729371316,38.73399981622291,0 -27.31742283358721,38.73390625960867,0 -27.31740603691906,38.73381421368396,0 -27.31738691352751,38.73372373129952,0 -27.31736547226281,38.73363485348813,0 -27.3173417234622,38.73354762306103,0 -27.31731567779347,38.7334620791648,0 -27.31725484731793,38.73328394721393,0 -27.31718700338276,38.73310653847143,0 -27.31711275146244,38.73293143259464,0 -27.31703261119879,38.73275985114364,0 -27.31694722647495,38.73259313231364,0 -27.31685689529248,38.73243181974895,0 -27.31676201912382,38.73227662912157,0 -27.31671298206116,38.73220150309059,0 -27.31666293209625,38.73212810549796,0 -27.31661227661347,38.73205699923543,0 -27.31656069386938,38.73198769886845,0 -27.31650821680554,38.73192024863353,0 -27.31645487560236,38.73185468730102,0 -27.31640070293113,38.7317910547423,0 -27.31634572252618,38.73172937855445,0 -27.31628996060108,38.7316696881305,0 -27.31623344127984,38.73161200928011,0 -27.31617621047509,38.73155638722061,0 -27.3161182679468,38.73150282010196,0 -27.31605963475033,38.73145132738083,0 -27.31600033035763,38.73140192614849,0 -27.31594037556882,38.73135463360343,0 -27.31587978617029,38.73130946207049,0 -27.31581857929581,38.73126642431748,0 -27.31575677086935,38.73122553153493,0 -27.3156527704438,38.73116185361738,0 -27.31554170151654,38.73109963974309,0 -27.31542386472344,38.73103905856655,0 -27.31529962883834,38.73098029989927,0 -27.31516933091119,38.73092352759272,0 -27.31503353968207,38.73086899367188,0 -27.31489280677559,38.73081691994438,0 -27.31474778321107,38.73076754755308,0 -27.31459828621695,38.7307208515928,0 -27.3144459900765,38.73067739151884,0 -27.31429177578321,38.73063741896419,0 -27.3141366200174,38.73060118733059,0 -27.31398146780202,38.73056892016895,0 -27.31382746993506,38.73054085972537,0 -27.31367571855508,38.73051720504985,0 -27.31352731674564,38.73049812819431,0 -27.31341267785485,38.73048720550404,0 -27.3132964139362,38.73048047626845,0 -27.31317850158515,38.73047793911955,0 -27.31305891383838,38.73047959346556,0 -27.31293762673685,38.73048543936736,0 -27.31281460186491,38.73049547841175,0 -27.31268980304968,38.73050971352913,0 -27.31256318784493,38.73052814954274,0 -27.31243479773525,38.73055077639731,0 -27.31230449341525,38.73057761469151,0 -27.31217221569132,38.73060867657974,0 -27.31203789325401,38.73064397877574,0 -27.31190146731493,38.73068353589763,0 -27.31176282339838,38.73072738032712,0 -27.31162185571558,38.7307755454431,0 -27.31147843157036,38.73082807652429,0 -27.31133997539781,38.73088199143302,0 -27.31119901272363,38.7309399469835,0 -27.31105536076912,38.73100201818407,0 -27.31090877809891,38.73106830925208,0 -27.310759111858,38.73113888552717,0 -27.31060586041863,38.73121397991248,0 -27.31044857409089,38.73129381228965,0 -27.31028658020748,38.73137872376707,0 -27.31013250924429,38.73146179164878,0 -27.30997268406842,38.73155010550451,0 -27.3096291141735,38.73174617476673,0 -27.30929124385214,38.73194515595647,0 -27.30858589766637,38.73236716617456,0 -27.30846443909933,38.73244054586751,0 -27.30834331952797,38.7325163699082,0 -27.30822250408354,38.73259466011587,0 -27.30810195414787,38.73267544150709,0 -27.30798163486212,38.73275873724598,0 -27.30786149566175,38.73284458214379,0 -27.30774148928419,38.73293300995644,0 -27.30762156246732,38.73302405991699,0 -27.30750174357355,38.73311770763699,0 -27.30738188422909,38.73321406622928,0 -27.30726191677222,38.73331319006256,0 -27.30714176310746,38.73341514364073,0 -27.30702135639913,38.73351998309065,0 -27.30690058253399,38.73362780719397,0 -27.30677933642419,38.73373870971911,0 -27.30665749240108,38.73385280557099,0 -27.30642007703608,38.7340825739197,0 -27.30617862442596,38.73432597975645,0 -27.30593152547554,38.73458463926821,0 -27.30567599602193,38.73486146356067,0 -27.30541747480931,38.73515009920343,0 -27.30514007540635,38.73546785840956,0 -27.3048382881122,38.7358207393522,0 -27.30443537141856,38.73629847521281,0 -27.30420005649243,38.73658075883485,0 -27.30398070264575,38.73684895218214,0 -27.30377426808506,38.7371067767567,0 -27.30357915006025,38.73735623911049,0 -27.30339357012429,38.73759964015736,0 -27.3032172961409,38.73783731364064,0 -27.30304967050737,38.73807014684569,0 -27.30289024194415,38.73829876752932,0 -27.30273754188693,38.73852536552321,0 -27.30259249104411,38.7387486631464,0 -27.30245484731259,38.73896903337771,0 -27.302324428356,38.73918676850842,0 -27.30220104515509,38.7394021879718,0 -27.30208461022994,38.73961544863714,0 -27.30197501706774,38.73982674574605,0 -27.30187218187916,38.74003624104221,0 -27.30179910867742,38.74019221892884,0 -27.30172780061271,38.74034994615923,0 -27.30165828537579,38.74050936149557,0 -27.30159059128677,38.74067040000463,0 -27.30152474500355,38.74083299848731,0 -27.30146077679973,38.74099708241063,0 -27.30139871512082,38.7411625788238,0 -27.30133858886561,38.74132941067847,0 -27.30128041378508,38.74149753653797,0 -27.3012242324597,38.74166683568892,0 -27.30117007333461,38.74183722243082,0 -27.30111796504586,38.74200860669132,0 -27.30106793437281,38.7421809007155,0 -27.30102001078861,38.74235400334019,0 -27.30097422166902,38.74252781570353,0 -27.30093059422608,38.74270223453223,0 -27.30085390739548,38.74302672415661,0 -27.30078586194628,38.74333502997241,0 -27.30072565786142,38.74363078564821,0 -27.30067290121955,38.74391594470653,0 -27.30062720028581,38.74419273765109,0 -27.30058852808611,38.74446146179137,0 -27.30055676442693,38.74472295554197,0 -27.30053183916652,38.74497780185374,0 -27.30051361060508,38.74522805259133,0 -27.30050223058137,38.74547245602788,0 -27.30049768391339,38.74571134208131,0 -27.30049996602056,38.74594496373341,0 -27.30050908194688,38.74617359513125,0 -27.30052503918575,38.7463973628218,0 -27.3005355868333,38.74650747449978,0 -27.30054784922963,38.74661642674666,0 -27.30056182820093,38.74672423576663,0 -27.30057752564854,38.7468309162024,0 -27.3006079685804,38.74701055477112,0 -27.30064358736799,38.74719242666733,0 -27.30068437866682,38.74737651479691,0 -27.30073033838699,38.74756280068849,0 -27.30078146223277,38.74775126668197,0 -27.3008377441993,38.74794189041844,0 -27.30089917788641,38.74813465020684,0 -27.30096575579929,38.74832952251878,0 -27.30103747681386,38.74852650215561,0 -27.3011143249842,38.74872554355125,0 -27.30119628958772,38.74892661892029,0 -27.30128335831027,38.74912969804196,0 -27.3013755189402,38.7493347522182,0 -27.30147275492677,38.74954174442095,0 -27.30157504950085,38.74975063894029,0 -27.30168238369371,38.74996139702883,0 -27.30183469543234,38.75025262590638,0 -27.30196348403068,38.75049336800841,0 -27.30208395440658,38.75071202990043,0 -27.30219900935177,38.75091376778937,0 -27.3023133186489,38.75110654586079,0 -27.3024258810843,38.75128843788446,0 -27.30253771000409,38.75146107912806,0 -27.30264942544821,38.75162542308289,0 -27.30276443109605,38.75178616087895,0 -27.3028802638966,38.75193953209021,0 -27.3029972687497,38.7520859927959,0 -27.30311570304835,38.75222586438345,0 -27.30323586251932,38.75235948925482,0 -27.30335786842798,38.75248699540575,0 -27.30348188905086,38.75260855849093,0 -27.30360806171091,38.75272431285605,0 -27.30370931400817,38.752811596566,0 -27.30381585687375,38.75289854852363,0 -27.30392786717001,38.75298531331713,0 -27.30404558045023,38.75307207359268,0 -27.30416915612842,38.75315895299789,0 -27.30429908115275,38.75324629963754,0 -27.30443581107892,38.7533344204761,0 -27.30458002582266,38.75342375417159,0 -27.30472100104183,38.75350802870835,0 -27.30487021468246,38.75359444799854,0 -27.30502905464379,38.75368381872399,0 -27.3052002484203,38.75377767688904,0 -27.30554615733454,38.75396175939723,0 -27.3062243606885,38.75431479202087,0 -27.30660938630246,38.75451856180307,0 -27.30750028641758,38.75499528197566,0 -27.30789811442759,38.75520521869706,0 -27.30814211292228,38.7553317671488,0 -27.30837125588197,38.75544860476854,0 -27.30858970942269,38.75555785451278,0 -27.30879953442597,38.7556605442866,0 -27.30902927390129,38.7557701473215,0 -27.3092514511578,38.75587301856237,0 -27.30946722800244,38.75596969548241,0 -27.30967737295673,38.75606052170409,0 -27.30988274078219,38.75614586129171,0 -27.31008358890433,38.75622581561847,0 -27.3102803266834,38.75630054749016,0 -27.31047326412405,38.75637017445904,0 -27.31067630549275,38.75643929737749,0 -27.31087555699582,38.75650275127011,0 -27.31107125558579,38.75656061150185,0 -27.31126359032983,38.75661293385252,0 -27.31145276521617,38.75665977253336,0 -27.3116388862943,38.75670115248465,0 -27.31182208149282,38.75673710209912,0 -27.31200245741867,38.75676764223754,0 -27.31218026032052,38.75679280833931,0 -27.31235542077905,38.75681258422109,0 -27.31252801590514,38.75682697855977,0 -27.31269811177347,38.75683599683192,0 -27.3128657783228,38.75683964232402,0 -27.31303106014185,38.75683791557459,0 -27.31319400702419,38.75683081604476,0 -27.31335466247628,38.75681834181771,0</coordinates></LinearRing></outerBoundaryIs>
        </Polygon>
      </MultiGeometry>
    </Placemark>
  </Folder>
  <Style id="PolyStyle00">
    <LabelStyle>
      <color>00000000</color>
      <scale>0.000000</scale>
    </LabelStyle>
    <LineStyle>
      <color>ff00ffff</color>
      <width>1.500000</width>
    </LineStyle>
    <PolyStyle>
      <color>00f0f0f0</color>
      <outline>1</outline>
    </PolyStyle>
  </Style>
</Document>
</kml>
